# Supplementary material
Source: MDPI journal article supplement (https://www.mdpi.com/2073-445X/10/10/1031)
Supplement: s1 [file s1]

### Electric supplementary material

**SM1.** Classification table of 774 vegetation communities recorded in the Actual Vegetation Map of Japan [1] into 22 land-cover types. Classification was done in reference to the work by Ogawa et al. [2], and land-cover types used in this study were those suggested by FAO [3].

| Land-cover classification proposed by Ogawa et al. [2] |                       |                                                                | Land-cover classification used in this study<br>(Land-cover types according to FAO [3]) |
|--------------------------------------------------------|-----------------------|----------------------------------------------------------------|-----------------------------------------------------------------------------------------|
| coarse category                                        | intermediate category | fine category                                                  |                                                                                         |
| grassland                                              | natural grassland     | alpine vegetation                                              | herbaceous or shrub depending on vegetation communities                                 |
|                                                        |                       | snow patch community                                           | snow/ice                                                                                |
|                                                        |                       | sand dune vegetation                                           | herbaceous                                                                              |
|                                                        |                       | coastal cliff herb vegetation                                  | herbaceous                                                                              |
|                                                        |                       | natural grassland                                              | herbaceous                                                                              |
|                                                        | secondary grassland   | secondary grassland (high height)                              | herbaceous                                                                              |
|                                                        |                       | secondary grassland (low height)                               | herbaceous                                                                              |
|                                                        | artificial grassland  | artificial grassland (including golf courses)                  | vegetated urban                                                                         |
|                                                        |                       | artificial grassland (excluding golf courses)                  | pasture or vegetated urban depending on vegetation communities                          |
|                                                        | others                | sasa grassland                                                 | herbaceous                                                                              |
| forest                                                 | natural forest        | evergreen conifer natural forest                               | coniferous forest                                                                       |
|                                                        |                       | deciduous conifer natural forest                               | coniferous forest                                                                       |
|                                                        |                       | evergreen broad-leaved natural forest                          | shrub or broad-leaved forest depending on vegetation communities                        |
|                                                        |                       | deciduous broad-leaved natural forest                          | shrub or broad-leaved forest depending on vegetation communities                        |
|                                                        |                       | evergreen conifer and<br>evergreen broad-leaved natural forest | mixed forest                                                                            |
|                                                        |                       | evergreen conifer and<br>deciduous broad-leaved natural forest | mixed forest                                                                            |
|                                                        |                       |                                                                |                                                                                         |

|                   |                   |                                                                                                                                                                                                                                                                  |                                                                                                                                                                                               |
|-------------------|-------------------|------------------------------------------------------------------------------------------------------------------------------------------------------------------------------------------------------------------------------------------------------------------|-----------------------------------------------------------------------------------------------------------------------------------------------------------------------------------------------|
|                   | secondary forest  | evergreen conifer secondary forest<br>evergreen broad-leaved secondary forest<br>deciduous broad-leaved secondary forest<br>evergreen conifer and<br>evergreen broad-leaved secondary forest<br>evergreen conifer and<br>deciduous broad-leaved secondary forest | coniferous forest<br>shrub or broad-leaved forest depending on vegetation communities<br>shrub or broad-leaved forest depending on vegetation communities<br>mixed forest<br><br>mixed forest |
|                   | plantation        | evergreen conifer plantation<br>deciduous conifer plantation<br>evergreen broad-leaved plantation<br><br>deciduous broad-leaved plantation                                                                                                                       | coniferous forest<br>coniferous forest<br>shrub or broad-leaved forest depending on vegetation communities<br>shrub or broad-leaved forest depending on vegetation communities                |
|                   | others            | natural scrub<br>coastal scrub<br>bamboo forest                                                                                                                                                                                                                  | shrub<br>shrub<br>bamboo                                                                                                                                                                      |
| wetland           | wetland           | salt marsh vegetation<br>wetland vegetation                                                                                                                                                                                                                      | salt marsh<br>fresh and brackish water wetland                                                                                                                                                |
| near water        | near water        | aquatic plant community<br>seaweed community<br>mangrove community                                                                                                                                                                                               | water body<br>water body<br>mangrove                                                                                                                                                          |
| special character | special character | natural bare land<br><br>plant communities in limestone<br>vegetation in volcanic desert,<br>vegetation in solfatara formation<br>rocky vegetation<br>plant community on raised coral-reef                                                                       | bare area<br><br>herbaceous<br>herbaceous or lichens/mosses depending on vegetation communities<br>bare area<br>sparse vegetation                                                             |
|                   | paddy             | paddy-field weed communities                                                                                                                                                                                                                                     | paddy                                                                                                                                                                                         |

|            |            |                                                |                 |
|------------|------------|------------------------------------------------|-----------------|
|            |            | weed communities in uncultivated paddy-field   | herbaceous      |
|            | cropland   | field weed communities                         | cropland        |
|            |            | weed communities in uncultivated field         | herbaceous      |
|            | others     | weed communities of the roadside               | herbaceous      |
|            |            | Thea sinensis garden                           | shrub crop      |
|            |            | orchard                                        | tree crop       |
| urban      | urban      | urban and residential district with many trees | vegetated urban |
|            |            | urban district with a few trees                | urban           |
|            |            | land constructed for residence and factory     | urban           |
| water body | water body | water body                                     | water body      |
| unknown    | unknown    | unknown                                        | unknown         |

[1] Environment Agency; Asia Air Survey Co. Ltd. The 5th national survey on the natural environment: Report of vegetation survey 1999.

[2] Ogawa, M.; Takenaka, A.; Kadoya, T.; Ishihama, F.; Yamano, H.; Akasaka, M. A comprehensive new land-use classification map for Japan for biodiversity assessment and species distribution modeling. Japanese J. Conserv. Ecol. 2013, 18, 69–76, doi:[https://doi.org/10.18960/hozen.18.1\\_69](https://doi.org/10.18960/hozen.18.1_69).

[3] Gregorio, A.D.; Jansen, L.J.M. Land Cover Classification System (LCCS): Classification Concepts and User Manual; FAO: Rome, 2000; ISBN 9789251042168.

**SM2.** Pearson correlation coefficients between pairs of indicators of agricultural ecosystem services and farmland biodiversity. Significant correlations were shown by .  $p < 0.1$ , \*  $p < 0.05$ , \*\*  $p < 0.01$ , \*\*\*  $p < 0.001$ .

|                               | Rice production | Other agricultural production | Landscape aesthetics | Rural tourism | Forest edges | Irrigation ponds |
|-------------------------------|-----------------|-------------------------------|----------------------|---------------|--------------|------------------|
| Rice production               | 1               |                               |                      |               |              |                  |
| Other agricultural production | 0.12.           | 1                             |                      |               |              |                  |
| Landscape aesthetics          | -0.43***        | -0.47***                      | 1                    |               |              |                  |
| Rural tourism                 | 0.02            | 0.00                          | 0.10***              | 1             |              |                  |
| Forest edges                  | -0.45***        | -0.30***                      | 0.70***              | 0.06*         | 1            |                  |
| Irrigation ponds              | 0.12**          | -0.34*                        | 0.18.                | 0.14***       | 0.04         | 1                |

**SM3.** Average values and standard deviations (mean $\pm$ SD) of agricultural ecosystem services and farmland biodiversity found within each bundle. Kruskal-Wallis test and Mann-Whitney's U test were performed to test the differences among and between the bundles, respectively. Different letters indicate significant differences between the bundles ( $p < 0.001$ ) and are in descending order of average values.

| Bundles                                            | Non-Rice                       | Rice                           | Hill                           | Mountain                       | Kruskal-Wallis |
|----------------------------------------------------|--------------------------------|--------------------------------|--------------------------------|--------------------------------|----------------|
| Number of municipalities                           | 400                            | 361                            | 474                            | 484                            | test ( $p$ )   |
| Rice production [%]                                | 3.3 $\pm$ 4.4 <sup>c</sup>     | 24.2 $\pm$ 13.8 <sup>a</sup>   | 10.2 $\pm$ 5.6 <sup>b</sup>    | 2.6 $\pm$ 2.4 <sup>d</sup>     | <0.001         |
| Other agricultural production [%]                  | 11.7 $\pm$ 11.2 <sup>a</sup>   | 9.4 $\pm$ 7.3 <sup>a</sup>     | 3.9 $\pm$ 4.0 <sup>b</sup>     | 2.1 $\pm$ 2.6 <sup>c</sup>     | <0.001         |
| Landscape aesthetics [%]                           | 24.2 $\pm$ 21.5 <sup>c</sup>   | 2.9 $\pm$ 5.9 <sup>d</sup>     | 30.4 $\pm$ 20.5 <sup>b</sup>   | 75.8 $\pm$ 21.7 <sup>a</sup>   | <0.001         |
| Rural tourism [%]                                  | 6.4 $\pm$ 11.4 <sup>b</sup>    | 8.0 $\pm$ 12.9 <sup>b</sup>    | 12.6 $\pm$ 15.3 <sup>a</sup>   | 10.3 $\pm$ 12.4 <sup>a</sup>   | <0.001         |
| Forest edges [m $\cdot$ ha <sup>-1</sup> ]         | 62.9 $\pm$ 35.3 <sup>b</sup>   | 20.4 $\pm$ 21.3 <sup>c</sup>   | 54.1 $\pm$ 28.9 <sup>b</sup>   | 125.6 $\pm$ 44.5 <sup>a</sup>  | <0.001         |
| Irrigation ponds [ponds $\cdot$ ha <sup>-1</sup> ] | 0.016 $\pm$ 0.017 <sup>d</sup> | 0.051 $\pm$ 0.109 <sup>c</sup> | 0.223 $\pm$ 0.331 <sup>a</sup> | 0.123 $\pm$ 0.178 <sup>b</sup> | <0.001         |
